# Supplementary material for: Targeting small molecule drugs to T cells with antibody-directed cell-penetrating gold nanoparticles
Source: Royal Society of Chemistry journal article supplement (doi:10.1039/c8bm01208c), 2018-11-13
Supplement: c8bm01208c1.pdf [file c8bm01208c1.pdf]

## Supporting Information for:

### Targeting small molecule drugs to T cells with antibody-directed cell- penetrating gold nanoparticles

Yu-Sang Sabrina Yang<sup>1,2</sup>, Kelly D. Moynihan<sup>2,3</sup>, Ahmet Bekdemir<sup>4</sup>, Tanmay M. Dichwalkar<sup>2</sup>,  
Michelle M. Noh<sup>3</sup>, Nicki Watson<sup>5</sup>, Mariane Melo<sup>2</sup>, Jessica Ingram<sup>5,8</sup>, Heikyung Suh<sup>2</sup>, Hidde  
Ploegh<sup>5,9</sup>, Francesco R. Stellacci<sup>4</sup>, and Darrell J. Irvine<sup>1,2,3,6,7\*</sup>

<sup>1</sup>Massachusetts Institute of Technology, Department of Materials Science and Engineering, Cambridge, 02139, United States. <sup>2</sup>Massachusetts Institute of Technology, Koch Institute for Integrative Cancer Research, Cambridge, 02139, United States. <sup>3</sup>Massachusetts Institute of Technology, Department of Biological Engineering, Cambridge, 02139, United States. <sup>4</sup>École Polytechnique Fédérale de Lausanne, Institute of Materials and Interfaculty Bioengineering Institute, Lausanne, 1015, Switzerland. <sup>5</sup>Whitehead Institute for Biomedical Research, Cambridge, 02142, United States. <sup>6</sup>Howard Hughes Medical Institute, Chevy Chase, Maryland, 20815, United States. <sup>7</sup>Ragon Institute of MGH, MIT, and Harvard, Charlestown, 02129, United States.

<sup>8</sup>deceased

<sup>9</sup>current address: Boston Children's Hospital

\* Correspondence: [djirvine@mit.edu](mailto:djirvine@mit.edu)

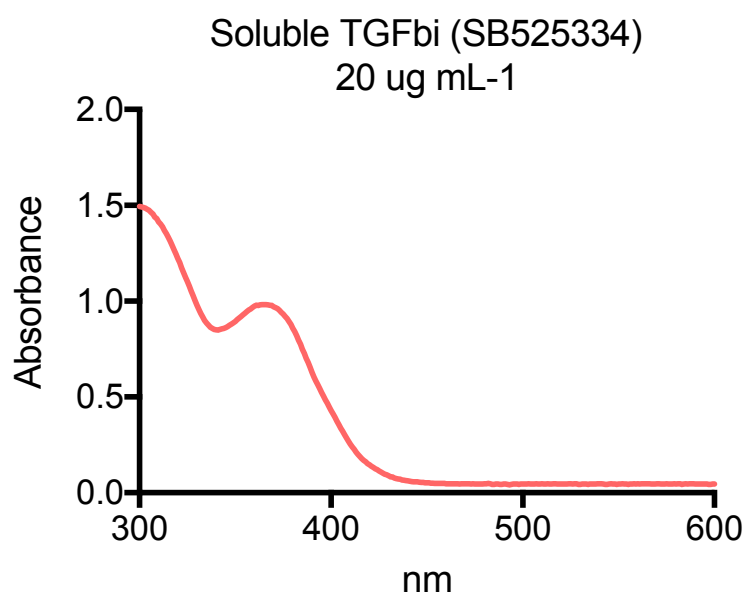

**Figure S1. UV-vis spectrum analysis of soluble drug TGFbi (SB525334).** SB525334 was dissolved in ethanol at 20 ug/mL concentration and measured on a NanoDrop UV-vis spectrometer.

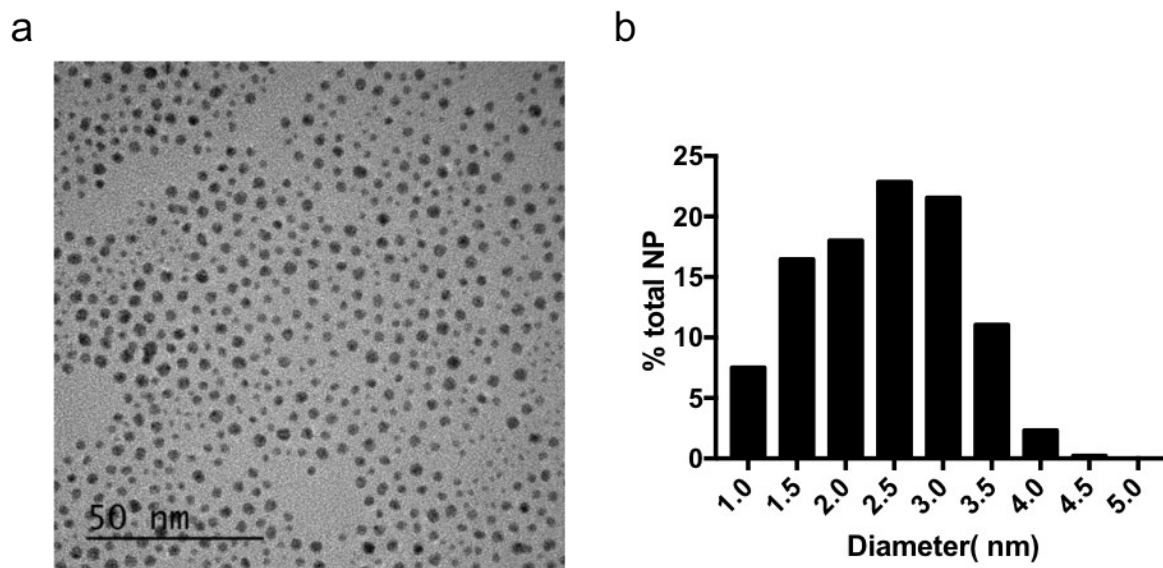

**Figure S2. Size analysis of MUSOT gold nanoparticles.** (a) Representative TEM micrograph of MUSOT gold nanoparticles imaged on a FEI Tecnai TEM. Scale bar = 50 nm. (b) ImageJ analysis of pooled images (total of 905 nanoparticles) revealed the average diameter of gold particles  $2.4 \pm 0.75$  nm .

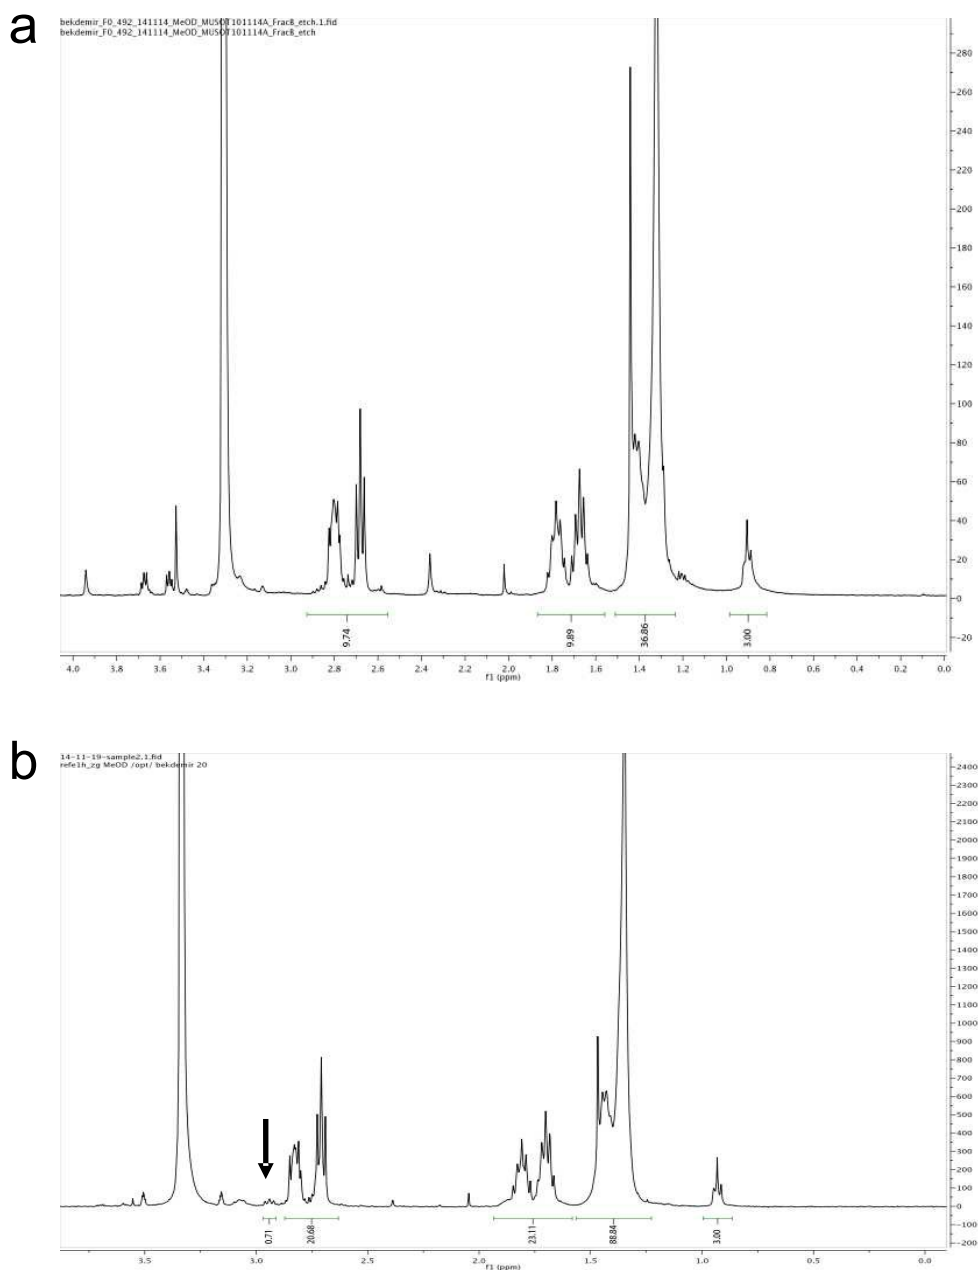

**Figure S3. NMR analysis of amino ligand exchange on amph-NPs.**  $^1\text{H}$  NMR data of control MUSOT amph-NPs without amino-ligand displacement (a) and 11-amino-1-undecanethiol surface modified MUSOT amph-NPs (b). Arrow indicates peak signature of protons adjacent to the introduced amino groups on the exchanged ligand, showing  $\sim 14\%$  of original ligands were replaced with amine ligands.

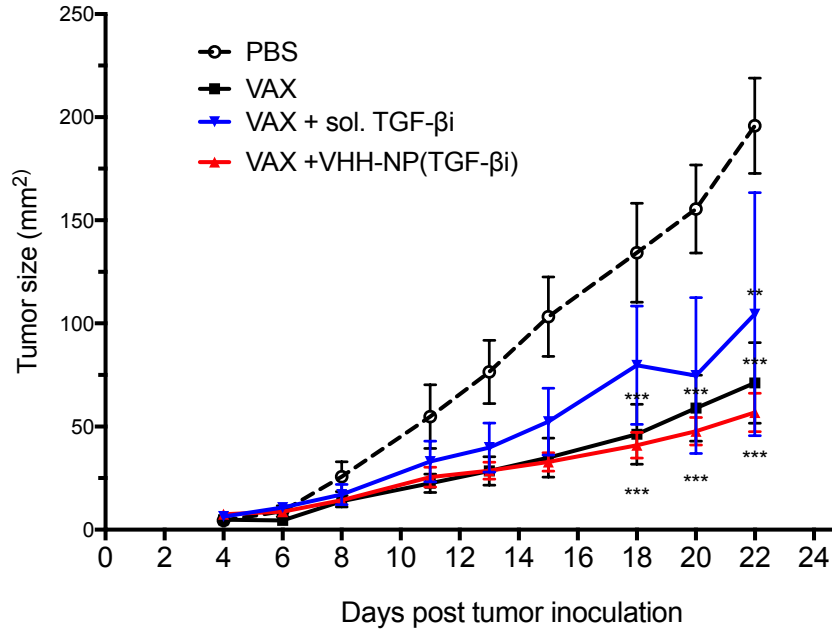

**Figure S4. Anti-tumor effect of combined vaccination and TGF-βi inhibitor therapy.** Shown is mean tumor size ( $\pm$ SEM) from groups of C57Bl/6 mice bearing B16F10 flank tumors, treated as described in Fig. 6. \*\*,  $p < 0.01$ ; \*\*\*,  $p < 0.001$  by two-way ANOVA followed by Bonferroni's post test.
